# Supplementary material for: The Prevalence and Determinants of Hesitancy for Regular COVID-19 Vaccination among Primary Healthcare Patients with Asthma or COPD in Greece: A Cross-Sectional Study
Source: MDPI journal article supplement (doi:10.3390/vaccines12040414), 2024-04-14
Supplement: s1 [file s1]

## ATTITUDES AND PERCEPTIONS ABOUT THE COVID-19 VACCINE IN PATIENTS WITH COPD/ASTHMA

|     |                                                                                       |                                  |                                      |                                          |
|-----|---------------------------------------------------------------------------------------|----------------------------------|--------------------------------------|------------------------------------------|
| 1.  | <b>Full name (initials):</b>                                                          |                                  |                                      |                                          |
| 2.  | <b>Residence:</b>                                                                     |                                  |                                      |                                          |
| 3.  | <b>Gender:</b>                                                                        | Male<br><input type="checkbox"/> | Female<br><input type="checkbox"/>   |                                          |
| 4.  | <b>Age:</b>                                                                           |                                  |                                      |                                          |
| 5.  | <b>Smoking:</b>                                                                       | Yes<br><input type="checkbox"/>  | No<br><input type="checkbox"/>       | Ex-smoker<br><input type="checkbox"/>    |
| 6.  | <b>Education:</b>                                                                     |                                  |                                      |                                          |
| 7.  | <b>Marital status:</b>                                                                |                                  |                                      |                                          |
| 8.  | <b>General health status:</b>                                                         | Good<br><input type="checkbox"/> | Moderate<br><input type="checkbox"/> | Bad<br><input type="checkbox"/>          |
| 9.  | <b>Chronic Conditions:</b>                                                            |                                  |                                      |                                          |
| 10. | <b>Medication:</b>                                                                    |                                  |                                      |                                          |
| 11. | <b>Do you belong to a vulnerable population?</b>                                      | YES<br><input type="checkbox"/>  | NO<br><input type="checkbox"/>       |                                          |
| 12. | <b>Do people who live with you belong to a vulnerable population?</b>                 | YES<br><input type="checkbox"/>  | NO<br><input type="checkbox"/>       |                                          |
| 13. | <b>COVID vaccination:</b>                                                             | YES<br><input type="checkbox"/>  | NO<br><input type="checkbox"/>       |                                          |
| 14. | <b>When?</b>                                                                          |                                  |                                      |                                          |
| 15. | <b>Number of doses:</b>                                                               |                                  |                                      |                                          |
| 16. | <b>Side effects?</b>                                                                  | Mild<br><input type="checkbox"/> | Moderate<br><input type="checkbox"/> | Severe<br><input type="checkbox"/>       |
| 17. | <b>Have you ever been infected by COVID-19:</b>                                       | YES<br><input type="checkbox"/>  | NO<br><input type="checkbox"/>       |                                          |
| 18. | <b>When?</b>                                                                          |                                  |                                      |                                          |
| 19. | <b>How would you describe your disease?</b>                                           | Mild<br><input type="checkbox"/> | Moderate<br><input type="checkbox"/> | Severe<br><input type="checkbox"/>       |
| 20. | <b>If the COVID-19 vaccine had to be given regularly every year, will you do it?"</b> | Yes<br><input type="checkbox"/>  | No<br><input type="checkbox"/>       | I'm not sure<br><input type="checkbox"/> |

---

**21. Why would you get a booster shot of the vaccine?**

- |                       |                             |                            |
|-----------------------|-----------------------------|----------------------------|
| A) My own initiative  | B) My doctor recommended it | C) Fear of serious illness |
| D) Free supply        | E) Due to profession        | F) Media campaigns         |
| G) Other reasons..... |                             |                            |
- 

**22. Why wouldn't you get a repeat dose of the vaccine?**

- |                                              |                                                                                         |                                                         |
|----------------------------------------------|-----------------------------------------------------------------------------------------|---------------------------------------------------------|
| A) Insufficient Information                  | B) Fear of side effects                                                                 | C) Reported side effects in family/social environment   |
| D) It's part of a conspiracy                 | E) Doubt of efficacy (does not protect 100%)                                            | F) Not sufficiently tested                              |
| G) I have had other vaccines that protect me | H) Due to pregnancy                                                                     | I) I have been infected by COVID-19, so I don't need it |
| K) I prefer to get sick                      | L) I believe that I will not get sick or that even if I get sick it will not be serious | M) I follow my family's point of view                   |
| N) Commercial reasons promote the vaccine    | O) I don't believe in vaccination in general                                            | P) Other reasons:.....                                  |
- 

**23. What does affect your opinion on whether to take the booster shot?**

- |                                                   |                                  |                                                  |
|---------------------------------------------------|----------------------------------|--------------------------------------------------|
| A) Religion                                       | B) The political leadership      | C) The opinion of scientists                     |
| D) Media and the Internet                         | E) The anti-vaccination movement | F) Worried about getting infected with COVID-19? |
| G) Would you – Have you had the Flu vaccine/shot? |                                  |                                                  |
-
